# Supplementary material for: Proposal and Validation of a Measurement Scale of the Acceptance of Ultra-Processed Food Products
Source: MDPI journal article supplement (doi:10.3390/foods13101481), 2024-05-10
Supplement: s1 [file s1]

## Supplementary materials

### Questionnaire

| Construct              | Code   | Items                                                                                                                |
|------------------------|--------|----------------------------------------------------------------------------------------------------------------------|
| Quality                | Qual1  | Ultra-processed food products offer an acceptable quality                                                            |
|                        | Qual2  | Ultra-processed food products have a high quality                                                                    |
|                        | Qual3  | Ultra-processed food products offer a reliable and trustworthy quality                                               |
|                        | Qual4  | Ultra-processed food products are safe                                                                               |
| Saves time             | Time1  | Since I am always under time pressure, I try to save time while cooking                                              |
|                        | Time2  | When eating at home, I prefer to cook and eat meals that can be prepared quickly                                     |
|                        | Time3  | Preferably, I spend as little time as possible cooking and on meal preparation                                       |
|                        | Time4  | I try to do my food shopping as quickly as possible                                                                  |
|                        | Time5  | I do not like to spend too much time shopping for food                                                               |
| Low price              | Price1 | Ultra-processed food products are not expensive                                                                      |
|                        | Price2 | Ultra-processed food products offer a good price-quality relationship                                                |
|                        | Price3 | In the food sector, I consider ultra-processed foods a good purchase                                                 |
|                        | Price4 | Ultra-processed food products offer high value compared to their price                                               |
|                        | Price5 | Ultra-processed food products offer the best quality for the best price                                              |
|                        | Price6 | Ultra-processed food products are affordable for most consumers                                                      |
|                        | Price7 | Ultra processed food products are a good option when you want to get a good value for money                          |
|                        | Price8 | I consider ultra-processed food products to be low priced                                                            |
| Effortless preparation | Effor1 | I do not want to think about what to cook for a long time                                                            |
|                        | Effor2 | I try to minimize the mental effort when cooking and preparing meals                                                 |
|                        | Effor3 | Cooking means mental effort, which I try to avoid if possible                                                        |
|                        | Effor4 | The less energy I need to cook and to prepare a meal, the better                                                     |
|                        | Effor5 | Cooking means physical effort, which I try to avoid if possible                                                      |
|                        | Effor6 | At home I preferably eat meals that can be prepared quickly                                                          |
| Convenience            | Conv1  | Ultra-processed food products are convenient and save time                                                           |
|                        | Conv2  | Ultra-processed food products are a good last-minute meal solution                                                   |
|                        | Conv3  | Ultra-processed food products are easy to prepare                                                                    |
| Hedonism               | Hed1   | Ultra-processed food products look nice                                                                              |
|                        | Hed2   | Ultra-processed food products are attractive and appealing                                                           |
|                        | Hed3   | Eating ultra-processed food products is a very pleasant experience                                                   |
|                        | Hed4   | Ultra-processed food products taste good                                                                             |
|                        | Hed5   | All the senses are involved when eating ultra-processed food products                                                |
|                        | Hed6   | In general terms, I believe that ultra-processed food products have a pleasant texture                               |
|                        | Hed7   | Eating ultra-processed food products is related with pleasant tastes, smells and seeing                              |
| Marketing strategies   | Mk1    | There is a great assortment and availability of ultra-processed food products in grocery shops and supermarkets      |
|                        | Mk2    | I often purchase ultra-processed food products because they have frequent sales promotions and price reductions      |
|                        | Mk3    | When purchasing ultra-processed food products, information from advertising helps me to make better buying decisions |
| Purchase intention     | Pint1  | I would purchase ultra-processed food products in the future                                                         |
|                        | Pint2  | I am likely to purchase ultra-processed food products in the next months                                             |
|                        | Pint3  | The likelihood that I would purchase ultra-processed food products is high                                           |
|                        | Pint4  |                                                                                                                      |

---

|              |      |                                                                                              |
|--------------|------|----------------------------------------------------------------------------------------------|
|              |      | I would rather buy ultra-processed food products, even if more healthy options are available |
|              | Sat1 | Ultra-processed food products meet my expectations                                           |
| Satisfaction | Sat2 | When I eat ultra-processed food products, I'm satisfied with the experience                  |
|              | Sat3 | Ultra-processed food products satisfy my needs and desires                                   |

---
